# Supplementary material for: Microtubule-dependent endosomal sorting of clathrin-independent cargo by Hook1
Source: PubMed Central journal article supplement — J Cell Biol. 2013 Apr 15;201(2):233–47. doi: 10.1083/jcb.201208172 (PMC3628520; doi:10.1083/jcb.201208172), 2013-04-15
Supplement: supp_jcb.201208172_JCB_201208172_sm.pdf [file supp_jcb.201208172_JCB_201208172_sm.pdf]

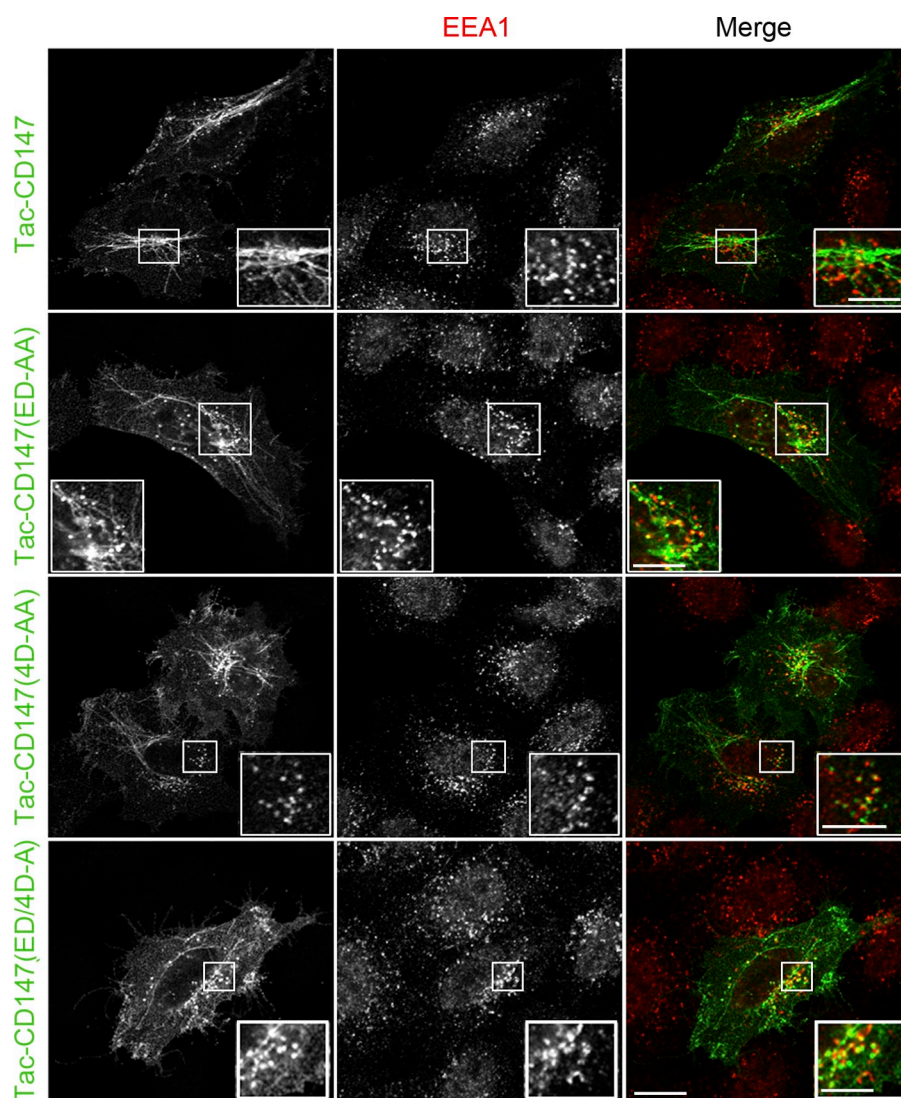

Figure S1. **Conserved acidic clusters in the carboxyl-terminal sequence of CD147 are important for sorting.** Site-directed mutagenesis analysis of two conserved acidic clusters in the cytoplasmic tail of CD147. The acidic clusters were independently mutated to Ala in the context of Tac-147-147 chimeric protein (green color in the merge image). The point mutants were expressed in HeLa cells, and their itineraries were followed after 1 h of internalization at 37°C. Cells were rinsed and fixed, and the cell surface antibody was then blocked with unlabeled goat anti-mouse IgG in the absence of saponin. EEA1 (red staining in the merge image) was labeled with a rabbit anti-EEA1 antibody. Alexa Fluor 488-conjugated goat anti-mouse antibody was used to detect internalized CIE cargo proteins, and Alexa Fluor 594-conjugated goat anti-rabbit antibody was used to detect EEA1. Insets show enlarged views of the boxed regions. Bars: (main panels) 10  $\mu$ m; (insets) 5  $\mu$ m.

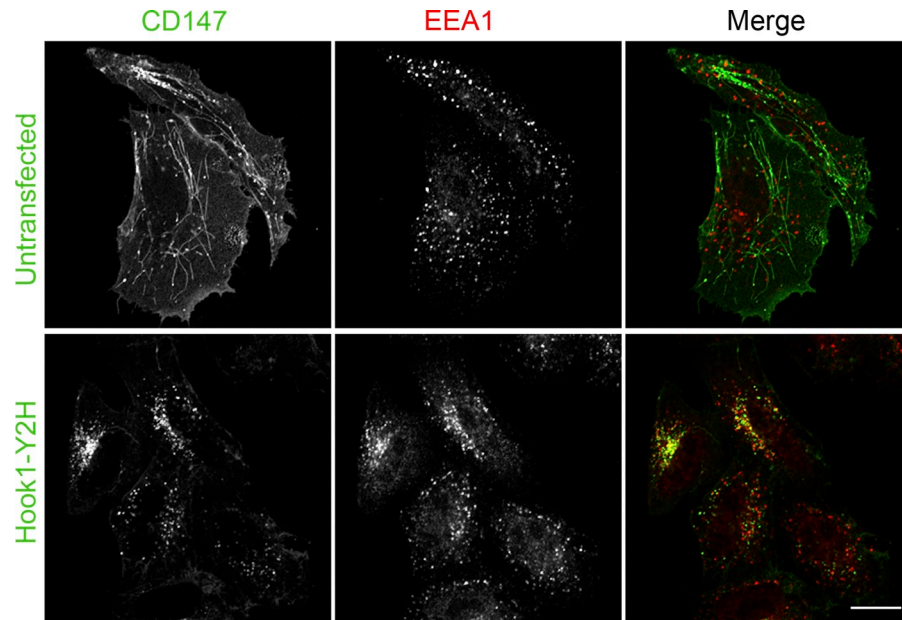

Figure S2. **Expression of Hook1-Y2H redirects CIE cargo to the EEA1-associated endosomal compartment.** HeLa cells overexpressing Hook1-Y2H were incubated with anti-CD147 antibody for 30 min at 37°C. After internalization, the cells were rinsed twice with PBS and fixed in PBS/2% formaldehyde for 10 min at room temperature. Surface anti-CD147 antibody was blocked with unlabeled goat anti-mouse IgG in the absence of saponin. EEA1 was localized using a rabbit anti-EEA1 antibody. Proteins were visualized using Alexa Fluor 488-conjugated goat anti-mouse and Alexa Fluor 594-conjugated goat anti-rabbit secondary antibodies to visualize CD147 and EEA1, respectively. Bar, 10  $\mu$ m.

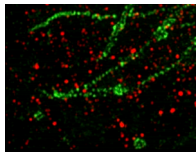

Video 1. **CD147 and Hook1 colocalize on tubular endosomes and endosomal structures.** After antibody internalization (30 min at 37°C), endogenous CD147 (green; Alexa Fluor 488) and endogenous Hook1 (red; Alexa Fluor 568) were visualized using super-resolution fluorescence microscopy in HeLa cells (SIM; DeltaVision OMX V4; Applied Precision). The video shows a 3D SIM image of internalized CD147 (green) with Hook1 (red) rotated from 0° to 14° (from Fig. 4 C).

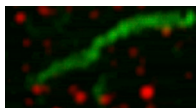

Video 2. **Localization of Hook1 at the end of tubular endosome loaded with CD147.** Movie of a 3D SIM image (from Fig. 4 C, box 1) from 0° to 18° with 2° increments showing internalized endogenous CD147 (green; Alexa Fluor 488) with endogenous Hook1 (red; Alexa Fluor 568) on the end of a membrane tubule. Images were acquired using super-resolution fluorescence microscopy (SIM; DeltaVision OMX V4; Applied Precision).

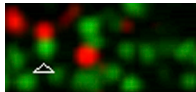

Video 3. **CD147 and Hook1 colocalize on endosomes.** HeLa cells were allowed to internalize antibody-bound CD147 for 30 min at 37°C. After internalization, cells were processed for immunofluorescence and stained for Hook1 using a rabbit anti-Hook1 antibody. The video shows a SIM image of internalized CD147 (green; Alexa Fluor 488) with Hook1 (red; Alexa Fluor 568) rotated from 0° to 10° in 2° increments showing Hook1 with a CD147-containing endosome (from Fig. 4 C, box 2). Images were generated using super-resolution fluorescence microscopy (DeltaVision OMX V4; Applied Precision).

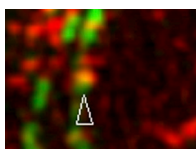

Video 4. **Endogenous CD98 and endogenous Hook1 colocalize in tubular endosomes.** HeLa cells were incubated with anti-CD98 antibody for 30 min at 37°C. Internalized CD98 was visualized using Alexa Fluor 488-conjugated secondary antibody, and Hook1 was labeled with rabbit anti-Hook1 and Alexa Fluor 568-conjugated secondary antibody. Super-resolution fluorescence microscopy was used to image the internalized CD98 (green) with Hook1 (red) in the middle of a membrane tubule (SIM image rotated from 0° to 12° in 2° increments; DeltaVision OMX V4; Applied Precision).
